# Supplementary material for: Changes in Metabolism and Proteostasis Drive Aging Phenotype in Aplysia californica Sensory Neurons
Source: Front Aging Neurosci. 2020 Sep 15;12:573764. doi: 10.3389/fnagi.2020.573764 (PMC7522570; doi:10.3389/fnagi.2020.573764)
Supplement: Supplementary file 12 [file Data_Sheet_5.xlsx]

## Sheet: Read Me
Supplementary Data Sheet 5. Results for Kyoto Encyclopedia of Genes and Genomes Orthology Enrichment analysis performed with the R package clusterProfiler. Each page is named for a transcriptional profile cluster and contains the enrichment results for that cluster.

## Sheet: B1
ID	Description	GeneRatio	BgRatio	pvalue	p.adjust	qvalue	geneID	Count
ko04141	Protein processing in endoplasmic reticulum	4/14	141/12659	1.35381e-05	0.00108305	0.000969044	K14001/K10601/K14026/K11718	4

## Sheet: B2
ID	Description	GeneRatio	BgRatio	pvalue	p.adjust	qvalue	geneID	Count
ko03010	Ribosome	20/176	143/12659	7.30306e-15	1.70892e-12	1.49136e-12	K02969/K02951/K02971/K02998/K02894/K02989/K02993/K02955/K02937/K02983/K02943/K02958/K02973/K02957/K02976/K02885/K02932/K02960/K02978/K02985	20
ko04141	Protein processing in endoplasmic reticulum	19/176	141/12659	7.17039e-14	8.38936e-12	7.32135e-12	K04374/K14009/K13249/K08860/K14006/K09487/K09523/K12666/K12670/K04079/K03283/K09580/K10956/K07151/K09584/K09490/K13525/K13250/K13251	19
ko04142	Lysosome	15/176	103/12659	1.0846e-11	8.45991e-10	7.38292e-10	K01135/K12389/K12311/K14379/K01365/K06497/K12383/K01369/K12382/K01379/K13443/K01204/K12386/K02154/K12348	15
ko03008	Ribosome biogenesis in eukaryotes	13/176	82/12659	9.00438e-11	5.26756e-09	4.59697e-09	K03264/K14521/K11128/K14556/K14572/K14574/K14530/K14536/K14555/K14538/K14550/K07562/K07178	13
ko00970	Aminoacyl-tRNA biosynthesis	9/176	65/12659	2.5906e-07	1.2124e-05	1.05805e-05	K01880/K01868/K22503/K01890/K01874/K01873/K01875/K04567/K01883	9
ko00510	N-Glycan biosynthesis	6/176	45/12659	3.44489e-05	0.00134351	0.00117247	K03850/K03848/K12666/K12670/K03843/K07151	6
ko03013	RNA transport	9/176	138/12659	0.000130444	0.00436055	0.00380543	K14301/K03241/K14315/K14530/K03257/K12812/K07562/K03260/K03242	9
ko04361	Axon regeneration	6/176	59/12659	0.000162266	0.00474628	0.00414205	K04505/K04459/K04441/K02599/K09442/K05099	6
ko04210	Apoptosis	7/176	109/12659	0.000807121	0.0209851	0.0183136	K04374/K08860/K16060/K01365/K07374/K01379/K04734	7

## Sheet: B3
ID	Description	GeneRatio	BgRatio	pvalue	p.adjust	qvalue	geneID	Count
ko04713	Circadian entrainment	12/133	79/12659	3.08145e-11	8.16584e-09	4.89788e-09	K12319/K04632/K05210/K04534/K07376/K05858/K04539/K04630/K02183/K04345/K02633/K16513	12
ko04922	Glucagon signaling pathway	10/133	57/12659	3.30811e-10	4.38324e-08	2.62907e-08	K01834/K00693/K04632/K00162/K07190/K05858/K02183/K00873/K04345/K00850	10
ko05034	Alcoholism	11/133	86/12659	1.42071e-09	1.25496e-07	7.52729e-08	K04368/K04632/K05210/K04534/K00274/K04539/K02833/K05869/K04630/K02183/K04345	11
ko04921	Oxytocin signaling pathway	12/133	112/12659	1.98246e-09	1.31338e-07	7.87767e-08	K04368/K12319/K04632/K04534/K04859/K05858/K02833/K05869/K04630/K06270/K02183/K04345	12
ko04540	Gap junction	9/133	60/12659	1.11626e-08	5.91616e-07	3.54852e-07	K04368/K12319/K04632/K07376/K05858/K02833/K07374/K04630/K04345	9
ko04730	Long-term depression	8/133	45/12659	1.86762e-08	7.59876e-07	4.55774e-07	K04368/K12319/K04632/K04534/K07376/K05858/K02833/K04630	8
ko05032	Morphine addiction	9/133	64/12659	2.00722e-08	7.59876e-07	4.55774e-07	K18283/K04632/K04534/K04539/K13298/K18437/K04630/K04345/K13755	9
ko04728	Dopaminergic synapse	9/133	84/12659	2.2479e-07	7.33743e-06	4.401e-06	K04632/K05210/K04534/K00274/K05858/K04539/K04630/K02183/K04345	9
ko04726	Serotonergic synapse	9/133	85/12659	2.49196e-07	7.33743e-06	4.401e-06	K04368/K04632/K04534/K00274/K05858/K04539/K02833/K04630/K04345	9
ko04720	Long-term potentiation	7/133	43/12659	2.83587e-07	7.51504e-06	4.50753e-06	K04368/K05210/K05858/K02833/K05869/K02183/K04345	7
ko04916	Melanogenesis	8/133	67/12659	4.6562e-07	1.12172e-05	6.72809e-06	K04368/K04632/K04534/K05858/K02833/K04630/K02183/K04345	8
ko04270	Vascular smooth muscle contraction	9/133	94/12659	5.94521e-07	1.3129e-05	7.8748e-06	K04368/K12319/K04632/K07376/K05858/K06270/K02183/K12337/K04345	9
ko04926	Relaxin signaling pathway	9/133	96/12659	7.11974e-07	1.45133e-05	8.7051e-06	K04368/K04632/K04500/K04534/K05858/K04539/K02833/K04630/K04345	9
ko04924	Renin secretion	7/133	50/12659	8.26937e-07	1.56527e-05	9.38853e-06	K12319/K04632/K05858/K04630/K02183/K04345/K13755	7
ko04915	Estrogen signaling pathway	8/133	77/12659	1.37567e-06	2.32819e-05	1.39645e-05	K04368/K04632/K04534/K05858/K02833/K04630/K02183/K04345	8
ko04371	Apelin signaling pathway	9/133	104/12659	1.4057e-06	2.32819e-05	1.39645e-05	K04368/K04500/K05858/K04539/K02833/K05869/K04630/K02183/K04345	9
ko05030	Cocaine addiction	6/133	39/12659	2.94796e-06	4.59535e-05	2.7563e-05	K04632/K05210/K11716/K00274/K04630/K04345	6
ko04910	Insulin signaling pathway	8/133	87/12659	3.49873e-06	5.1509e-05	3.08952e-05	K04368/K00693/K07190/K04739/K02833/K02183/K07192/K04345	8
ko04611	Platelet activation	8/133	90/12659	4.5205e-06	5.98967e-05	3.59261e-05	K12319/K04632/K07376/K05858/K04630/K06270/K12757/K04345	8
ko04725	Cholinergic synapse	8/133	90/12659	4.5205e-06	5.98967e-05	3.59261e-05	K04368/K04534/K05858/K04539/K02833/K05869/K04630/K04345	8
ko04022	cGMP-PKG signaling pathway	9/133	121/12659	4.97359e-06	6.27619e-05	3.76447e-05	K04368/K18283/K12319/K07376/K05858/K04630/K06270/K02183/K12337	9
ko04740	Olfactory transduction	5/133	25/12659	5.32737e-06	6.41706e-05	3.84896e-05	K18283/K07376/K02183/K04345/K13755	5
ko05031	Amphetamine addiction	6/133	46/12659	7.96877e-06	9.18141e-05	5.50702e-05	K04632/K05210/K00274/K05869/K02183/K04345	6
ko05230	Central carbon metabolism in cancer	6/133	48/12659	1.02619e-05	0.000113309	6.79627e-05	K04368/K01834/K00162/K02833/K00873/K00850	6
ko04961	Endocrine and other factor-regulated calcium reabsorption	5/133	33/12659	2.2246e-05	0.000232659	0.000139549	K04632/K11827/K04645/K05858/K04345	5
ko04070	Phosphatidylinositol signaling system	6/133	55/12659	2.2827e-05	0.000232659	0.000139549	K01092/K05858/K02183/K00901/K07756/K00888	6
ko04724	Glutamatergic synapse	7/133	88/12659	3.77474e-05	0.000370484	0.000222217	K04632/K05210/K04534/K05858/K04539/K04630/K04345	7
ko04970	Salivary secretion	6/133	63/12659	4.99502e-05	0.000472743	0.000283552	K12319/K04632/K07376/K05858/K02183/K04345	6
ko04015	Rap1 signaling pathway	9/133	162/12659	5.17788e-05	0.000473151	0.000283797	K04368/K04632/K05210/K12362/K04534/K05858/K02833/K04630/K02183	9
ko04912	GnRH signaling pathway	6/133	64/12659	5.46465e-05	0.000482711	0.000289531	K04368/K04632/K05858/K02833/K02183/K04345	6
ko04925	Aldosterone synthesis and secretion	6/133	65/12659	5.96895e-05	0.000510249	0.000306048	K18283/K04632/K05858/K05869/K02183/K04345	6
ko00230	Purine metabolism	10/133	208/12659	6.73212e-05	0.000557504	0.000334391	K13811/K18283/K12319/K00759/K00760/K00944/K13298/K18437/K00873/K13755	10
ko04971	Gastric acid secretion	5/133	49/12659	0.000156234	0.00125461	0.000752514	K04632/K05858/K04630/K02183/K04345	5
ko05163	Human cytomegalovirus infection	9/133	192/12659	0.000190095	0.00148163	0.000888682	K04368/K04632/K04534/K05858/K04539/K02833/K04630/K02183/K04345	9
ko04934	Cushing syndrome	7/133	122/12659	0.000296487	0.00224483	0.00134645	K04368/K04632/K05858/K13298/K18437/K04630/K04345	7
ko04024	cAMP signaling pathway	8/133	163/12659	0.000319194	0.00234963	0.00140931	K04368/K04632/K05210/K05869/K04630/K06270/K02183/K04345	8
ko04361	Axon regeneration	5/133	59/12659	0.000377178	0.00268866	0.00161266	K04632/K04534/K05858/K00901/K04345	5
ko04935	Growth hormone synthesis, secretion and action	6/133	91/12659	0.000385544	0.00268866	0.00161266	K04368/K04632/K05858/K02833/K04630/K04345	6
ko04261	Adrenergic signaling in cardiomyocytes	6/133	95/12659	0.000485805	0.00330098	0.00197993	K04632/K04859/K05858/K04630/K02183/K04345	6
ko00010	Glycolysis / Gluconeogenesis	6/133	99/12659	0.000605307	0.00401016	0.0024053	K01834/K00149/K00382/K00162/K00873/K00850	6
ko04211	Longevity regulating pathway	5/133	68/12659	0.00072835	0.00470763	0.00282364	K08733/K03781/K02833/K05869/K04345	5
ko00280	Valine, leucine and isoleucine degradation	5/133	69/12659	0.000778713	0.00491331	0.00294701	K00149/K00382/K00166/K01966/K00248	5
ko04510	Focal adhesion	7/133	148/12659	0.000944418	0.00582025	0.00349099	K04368/K08131/K05700/K02833/K06270/K12757/K06278	7
ko04020	Calcium signaling pathway	7/133	151/12659	0.00106212	0.00639685	0.00383684	K04632/K07190/K05858/K05869/K02183/K04345/K13755	7
ko01200	Carbon metabolism	11/133	353/12659	0.00123166	0.00725309	0.00435042	K01834/K00029/K00030/K00382/K03781/K01966/K00162/K00814/K00248/K00873/K00850	11
ko04923	Regulation of lipolysis in adipocytes	4/133	46/12659	0.00135037	0.00777928	0.00466602	K04632/K07376/K04630/K04345	4
ko05200	Pathways in cancer	12/133	417/12659	0.00146712	0.00827205	0.00496159	K04368/K04632/K12362/K04500/K08733/K05858/K04539/K10053/K02833/K04630/K02183/K04345	12
ko04071	Sphingolipid signaling pathway	5/133	80/12659	0.00151951	0.00838894	0.0050317	K04368/K12351/K05858/K02833/K04630	5
ko04723	Retrograde endocannabinoid signaling	6/133	119/12659	0.00158072	0.00854878	0.00512757	K03934/K04534/K05858/K04539/K04630/K04345	6
ko05170	Human immunodeficiency virus 1 infection	7/133	163/12659	0.00165282	0.00875995	0.00525423	K04368/K04534/K04539/K02833/K04630/K02183/K10611	7
ko05205	Proteoglycans in cancer	7/133	165/12659	0.00177216	0.00920829	0.00552315	K04368/K10380/K04500/K02833/K06270/K06278/K04345	7
ko04144	Endocytosis	7/133	166/12659	0.00183429	0.00934783	0.00560684	K11827/K04500/K04645/K02833/K17919/K06278/K05633	7
ko04928	Parathyroid hormone synthesis, secretion and action	5/133	85/12659	0.00198864	0.00975908	0.00585351	K04368/K04632/K05858/K04630/K04345	5
ko05142	Chagas disease (American trypanosomiasis)	5/133	85/12659	0.00198864	0.00975908	0.00585351	K04632/K04500/K04534/K05858/K04630	5
ko00982	Drug metabolism - cytochrome P450	3/133	25/12659	0.0022019	0.0106092	0.00636339	K04097/K00274/K00485	3
ko04927	Cortisol synthesis and secretion	4/133	54/12659	0.00245321	0.0114053	0.0068409	K04632/K05858/K18437/K04345	4
ko05214	Glioma	4/133	54/12659	0.00245321	0.0114053	0.0068409	K04368/K02833/K05869/K02183	4
ko04014	Ras signaling pathway	7/133	180/12659	0.00289472	0.0132259	0.00793291	K04368/K05210/K12362/K04539/K02833/K02183/K04345	7
ko05221	Acute myeloid leukemia	4/133	57/12659	0.00299091	0.0134338	0.00805759	K04368/K10053/K02833/K02633	4
ko05016	Huntington disease	7/133	188/12659	0.00368224	0.016252	0.00974798	K05210/K03934/K11827/K10428/K04645/K05858/K07374	7
ko05020	Prion diseases	3/133	30/12659	0.00374103	0.016252	0.00974798	K04368/K06491/K04345	3
ko00630	Glyoxylate and dicarboxylate metabolism	5/133	100/12659	0.00402894	0.0172205	0.0103289	K01816/K18123/K00382/K03781/K01966	5
ko00983	Drug metabolism - other enzymes	3/133	32/12659	0.00450107	0.0189331	0.0113561	K00757/K00760/K01464	3
ko00620	Pyruvate metabolism	5/133	104/12659	0.00476056	0.0197117	0.0118231	K00029/K00149/K00382/K00162/K00873	5
ko04962	Vasopressin-regulated water reabsorption	3/133	33/12659	0.00491356	0.0200322	0.0120153	K04632/K10428/K04345	3
ko04072	Phospholipase D signaling pathway	5/133	108/12659	0.00558206	0.0223232	0.0133895	K04368/K04632/K05858/K02833/K00901	5
ko04750	Inflammatory mediator regulation of TRP channels	4/133	68/12659	0.00564399	0.0223232	0.0133895	K04632/K05858/K02183/K04345	4
ko04727	GABAergic synapse	4/133	69/12659	0.00594339	0.0231617	0.0138924	K04534/K04539/K04630/K04345	4
ko04062	Chemokine signaling pathway	6/133	159/12659	0.00661821	0.0254178	0.0152456	K04368/K05858/K04539/K02833/K04630/K04345	6
ko05210	Colorectal cancer	4/133	72/12659	0.00690462	0.0261389	0.0156781	K04368/K04500/K08733/K02833	4
ko05100	Bacterial invasion of epithelial cells	4/133	74/12659	0.00759945	0.0283641	0.0170129	K05700/K04645/K06278/K16942	4
ko04913	Ovarian steroidogenesis	3/133	40/12659	0.00843597	0.031049	0.0186233	K01068/K04632/K04345	3
ko01522	Endocrine resistance	4/133	77/12659	0.00872561	0.0316751	0.0189988	K04368/K04632/K02833/K04345	4
ko00380	Tryptophan metabolism	4/133	78/12659	0.00912392	0.0326735	0.0195976	K00149/K00382/K03781/K00274	4
ko00410	beta-Alanine metabolism	3/133	44/12659	0.01097	0.0383503	0.0230026	K00149/K00248/K01464	3
ko01230	Biosynthesis of amino acids	7/133	231/12659	0.0109986	0.0383503	0.0230026	K01834/K00030/K01778/K00814/K00611/K00873/K00850	7
ko04152	AMPK signaling pathway	4/133	84/12659	0.0117636	0.0404851	0.024283	K00693/K07877/K00850/K07881	4
ko05146	Amoebiasis	4/133	87/12659	0.0132494	0.045014	0.0269995	K05700/K04632/K05858/K04345	4
ko04714	Thermogenesis	6/133	187/12659	0.0140323	0.0470705	0.028233	K04632/K03934/K07376/K02833/K04345/K02129	6
ko04722	Neurotrophin signaling pathway	4/133	90/12659	0.0148499	0.0485252	0.0291055	K04368/K02833/K05869/K02183	4
ko04919	Thyroid hormone signaling pathway	4/133	90/12659	0.0148499	0.0485252	0.0291055	K04368/K05858/K02833/K04345	4
ko04745	Phototransduction - fly	2/133	18/12659	0.0150154	0.0485252	0.0291055	K05858/K02183	2

## Sheet: B4
ID	Description	GeneRatio	BgRatio	pvalue	p.adjust	qvalue	geneID	Count
ko01200	Carbon metabolism	15/64	353/12659	1.64573e-10	2.09008e-08	1.4725e-08	K01834/K01783/K00927/K14455/K14454/K00134/K01681/K01623/K01676/K00030/K00234/K01810/K01803/K07515/K01689	15
ko00710	Carbon fixation in photosynthetic organisms	7/64	36/12659	4.48139e-10	2.84568e-08	2.00483e-08	K01783/K00927/K14455/K14454/K00134/K01623/K01803	7
ko01230	Biosynthesis of amino acids	12/64	231/12659	1.45684e-09	6.16727e-08	4.34495e-08	K01834/K01783/K00927/K14455/K14454/K00134/K01681/K01623/K00030/K01953/K01803/K01689	12
ko05012	Parkinson disease	9/64	122/12659	9.39442e-09	2.98273e-07	2.10138e-07	K03954/K03963/K03968/K03943/K03942/K05687/K02132/K03935/K00234	9
ko05016	Huntington disease	10/64	188/12659	3.10513e-08	6.85711e-07	4.83095e-07	K03954/K03963/K07374/K03968/K03943/K03942/K02132/K03935/K04564/K00234	10
ko00010	Glycolysis / Gluconeogenesis	8/64	99/12659	3.2424e-08	6.85711e-07	4.83095e-07	K01834/K00128/K00927/K00134/K01623/K01810/K01803/K01689	8
ko05010	Alzheimer disease	9/64	143/12659	3.77951e-08	6.85711e-07	4.83095e-07	K03954/K03963/K03968/K03943/K03942/K00134/K02132/K03935/K00234	9
ko04714	Thermogenesis	9/64	187/12659	3.77902e-07	5.99919e-06	4.22653e-06	K03954/K03963/K03968/K03943/K03942/K02132/K03935/K00234/K05692	9
ko00280	Valine, leucine and isoleucine degradation	6/64	69/12659	1.22868e-06	1.7338e-05	1.22149e-05	K00253/K00827/K00128/K09478/K07515/K13524	6
ko04932	Non-alcoholic fatty liver disease (NAFLD)	7/64	124/12659	2.85422e-06	3.62486e-05	2.55378e-05	K03954/K03963/K03968/K03943/K03942/K03935/K00234	7
ko00190	Oxidative phosphorylation	8/64	218/12659	1.31446e-05	0.00015176	0.000106918	K03954/K03963/K03968/K03943/K03942/K02132/K03935/K00234	8
ko00250	Alanine, aspartate and glutamate metabolism	5/64	70/12659	2.64788e-05	0.000280234	0.00019743	K00827/K14455/K14454/K01953/K13524	5
ko04723	Retrograde endocannabinoid signaling	6/64	119/12659	2.92202e-05	0.000285458	0.00020111	K03954/K03963/K03968/K03943/K03942/K03935	6
ko00020	Citrate cycle (TCA cycle)	4/64	58/12659	0.000205399	0.00186326	0.0013127	K01681/K01676/K00030/K00234	4
ko00983	Drug metabolism - other enzymes	3/64	32/12659	0.000550559	0.0046061	0.00324508	K00088/K00106/K00699	3
ko04066	HIF-1 signaling pathway	4/64	76/12659	0.000580296	0.0046061	0.00324508	K00927/K00134/K01623/K01689	4
ko01210	2-Oxocarboxylic acid metabolism	4/64	82/12659	0.000773406	0.0057778	0.00407056	K14455/K14454/K01681/K00030	4
ko00410	beta-Alanine metabolism	3/64	44/12659	0.00140795	0.00993389	0.00699859	K00128/K07515/K13524	3
ko00330	Arginine and proline metabolism	3/64	108/12659	0.0021487	0.0143624	0.0101185	K00128/K01259/K14455/K14454	4
ko00071	Fatty acid degradation	3/64	57/12659	0.00296876	0.0188516	0.0132813	K00128/K09478/K07515	3
ko04146	Peroxisome	3/64	73/12659	0.00595921	0.036039	0.0253901	K00106/K11187/K04564	3
ko00982	Drug metabolism - cytochrome P450	2/64	25/12659	0.00700376	0.0369415	0.0260259	K00699/K04097	2
ko00380	Tryptophan metabolism	3/64	78/12659	0.00716006	0.0369415	0.0260259	K00486/K00128/K07515	3
ko05130	Pathogenic Escherichia coli infection	3/64	152/12659	0.00726617	0.0369415	0.0260259	K10358/K07374/K00134/K05692	4
ko00040	Pentose and glucuronate interconversions	3/64	79/12659	0.00741617	0.0369415	0.0260259	K01805/K01783/K00699	3
ko00960	Tropane, piperidine and pyridine alkaloid biosynthesis	2/64	26/12659	0.00756283	0.0369415	0.0260259	K14455/K14454	2
ko00030	Pentose phosphate pathway	3/64	83/12659	0.00849465	0.0399563	0.0281499	K01783/K01623/K01810	3

## Sheet: B_UP
ID	Description	GeneRatio	BgRatio	pvalue	p.adjust	qvalue	geneID	Count
ko04141	Protein processing in endoplasmic reticulum	23/190	141/12659	1.00502e-17	2.39196e-15	2.02063e-15	K14001/K10601/K14026/K11718/K04374/K14009/K13249/K08860/K14006/K09487/K09523/K12666/K12670/K04079/K03283/K09580/K10956/K07151/K09584/K09490/K13525/K13250/K13251	23
ko03010	Ribosome	20/190	143/12659	3.22432e-14	3.83694e-12	3.24129e-12	K02969/K02951/K02971/K02998/K02894/K02989/K02993/K02955/K02937/K02983/K02943/K02958/K02973/K02957/K02976/K02885/K02932/K02960/K02978/K02985	20
ko04142	Lysosome	16/190	103/12659	2.52262e-12	2.00128e-10	1.6906e-10	K12301/K01135/K12389/K12311/K14379/K01365/K06497/K12383/K01369/K12382/K01379/K13443/K01204/K12386/K02154/K12348	16
ko03008	Ribosome biogenesis in eukaryotes	13/190	82/12659	2.34598e-10	1.39586e-08	1.17916e-08	K03264/K14521/K11128/K14556/K14572/K14574/K14530/K14536/K14555/K14538/K14550/K07562/K07178	13
ko00970	Aminoacyl-tRNA biosynthesis	9/190	65/12659	4.95371e-07	2.35796e-05	1.99191e-05	K01880/K01868/K22503/K01890/K01874/K01873/K01875/K04567/K01883	9
ko03013	RNA transport	10/190	138/12659	4.29404e-05	0.0017033	0.00143888	K03231/K14301/K03241/K14315/K14530/K03257/K12812/K07562/K03260/K03242	10
ko00510	N-Glycan biosynthesis	6/190	45/12659	5.28799e-05	0.00179792	0.00151881	K03850/K03848/K12666/K12670/K03843/K07151	6
ko04210	Apoptosis	8/190	109/12659	0.000231764	0.00650084	0.00549164	K05692/K04374/K08860/K16060/K01365/K07374/K01379/K04734	8
ko04361	Axon regeneration	6/190	59/12659	0.00024583	0.00650084	0.00549164	K04505/K04459/K04441/K02599/K09442/K05099	6
ko05134	Legionellosis	6/190	69/12659	0.000577842	0.0137526	0.0116177	K03231/K03990/K03283/K07937/K13525/K04734	6
ko05110	Vibrio cholerae infection	5/190	49/12659	0.000806629	0.0174525	0.0147432	K05692/K10949/K10956/K07937/K02154	5
ko04915	Estrogen signaling pathway	6/190	77/12659	0.00103526	0.0194104	0.0163971	K09048/K04374/K09487/K04079/K03283/K01379	6
ko04918	Thyroid hormone synthesis	5/190	52/12659	0.00106023	0.0194104	0.0163971	K09048/K04374/K09487/K09490/K01540	5
ko05140	Leishmaniasis	5/190	59/12659	0.0018769	0.0319073	0.026954	K03231/K06483/K03990/K04441/K04734	5
ko04145	Phagosome	6/190	95/12659	0.00304022	0.0451761	0.0381629	K05692/K03990/K01365/K07374/K10956/K02154	6
ko04217	Necroptosis	6/190	96/12659	0.00320329	0.0451761	0.0381629	K08601/K16060/K12196/K04079/K00522/K11974	6
ko04612	Antigen processing and presentation	4/190	41/12659	0.00322687	0.0451761	0.0381629	K01365/K01369/K04079/K03283	4
ko05418	Fluid shear stress and atherosclerosis	6/190	99/12659	0.00373178	0.0493425	0.0416825	K05692/K21278/K01365/K09487/K04079/K04441	6

## Sheet: B_DOWN
ID	Description	GeneRatio	BgRatio	pvalue	p.adjust	qvalue	geneID	Count
ko01200	Carbon metabolism	24/191	353/12659	6.42068e-10	9.79355e-08	5.83321e-08	K01834/K00029/K00030/K00382/K03781/K01966/K00162/K00814/K00248/K00873/K00850/K01783/K00927/K14455/K14454/K00134/K01681/K01623/K01676/K00234/K01810/K01803/K07515/K01689	24
ko04922	Glucagon signaling pathway	11/191	57/12659	6.9705e-10	9.79355e-08	5.83321e-08	K01834/K00693/K04632/K00162/K07190/K05858/K02183/K00873/K04345/K00850/K00688	11
ko04713	Circadian entrainment	12/191	79/12659	2.08688e-09	1.5606e-07	9.2952e-08	K12319/K04632/K05210/K04534/K07376/K05858/K04539/K04630/K02183/K04345/K02633/K16513	12
ko00710	Carbon fixation in photosynthetic organisms	9/191	36/12659	2.22296e-09	1.5606e-07	9.2952e-08	K00029/K00814/K01783/K00927/K14455/K14454/K00134/K01623/K01803	9
ko00010	Glycolysis / Gluconeogenesis	13/191	99/12659	2.77687e-09	1.5606e-07	9.2952e-08	K01834/K00149/K00382/K00162/K00873/K00850/K00128/K00927/K00134/K01623/K01810/K01803/K01689	13
ko00280	Valine, leucine and isoleucine degradation	11/191	69/12659	5.88678e-09	2.75697e-07	1.6421e-07	K00149/K00382/K00166/K01966/K00248/K00253/K00827/K00128/K09478/K07515/K13524	11
ko04921	Oxytocin signaling pathway	13/191	112/12659	1.28538e-08	5.15987e-07	3.07331e-07	K04368/K12319/K04632/K04534/K04859/K05858/K02833/K05869/K04630/K06270/K02183/K04345/K05692	13
ko05016	Huntington disease	16/191	188/12659	2.40361e-08	8.44268e-07	5.0286e-07	K05210/K03934/K11827/K10428/K04645/K05858/K07374/K03954/K03963/K03968/K03943/K03942/K02132/K03935/K04564/K00234	16
ko05010	Alzheimer disease	14/191	143/12659	3.18847e-08	9.95512e-07	5.92944e-07	K05210/K03934/K11716/K05858/K02183/K03954/K03963/K03968/K03943/K03942/K00134/K02132/K03935/K00234	14
ko05034	Alcoholism	11/191	86/12659	6.31902e-08	1.77564e-06	1.0576e-06	K04368/K04632/K05210/K04534/K00274/K04539/K02833/K05869/K04630/K02183/K04345	11
ko01230	Biosynthesis of amino acids	17/191	231/12659	7.43605e-08	1.89957e-06	1.13142e-06	K01834/K00030/K01778/K00814/K00611/K00873/K00850/K01783/K00927/K14455/K14454/K00134/K01681/K01623/K01953/K01803/K01689	17
ko04714	Thermogenesis	15/191	187/12659	1.46594e-07	3.43275e-06	2.0446e-06	K04632/K03934/K07376/K02833/K04345/K02129/K03954/K03963/K03968/K03943/K03942/K02132/K03935/K00234/K05692	15
ko04723	Retrograde endocannabinoid signaling	12/191	119/12659	2.28634e-07	4.942e-06	2.94354e-06	K03934/K04534/K05858/K04539/K04630/K04345/K03954/K03963/K03968/K03943/K03942/K03935	12
ko04540	Gap junction	9/191	60/12659	2.55514e-07	5.12854e-06	3.05464e-06	K04368/K12319/K04632/K07376/K05858/K02833/K07374/K04630/K04345	9
ko05012	Parkinson disease	12/191	122/12659	3.00688e-07	5.44586e-06	3.24365e-06	K03934/K04630/K04345/K03954/K03963/K03968/K03943/K03942/K05687/K02132/K03935/K00234	12
ko04730	Long-term depression	8/191	45/12659	3.10085e-07	5.44586e-06	3.24365e-06	K04368/K12319/K04632/K04534/K07376/K05858/K02833/K04630	8
ko05032	Morphine addiction	9/191	64/12659	4.51921e-07	7.46999e-06	4.44926e-06	K18283/K04632/K04534/K04539/K13298/K18437/K04630/K04345/K13755	9
ko04720	Long-term potentiation	7/191	43/12659	3.24566e-06	5.06684e-05	3.01789e-05	K04368/K05210/K05858/K02833/K05869/K02183/K04345	7
ko04728	Dopaminergic synapse	9/191	84/12659	4.66031e-06	6.89236e-05	4.10521e-05	K04632/K05210/K04534/K00274/K05858/K04539/K04630/K02183/K04345	9
ko04726	Serotonergic synapse	9/191	85/12659	5.14507e-06	7.22882e-05	4.30561e-05	K04368/K04632/K04534/K00274/K05858/K04539/K02833/K04630/K04345	9
ko04910	Insulin signaling pathway	9/191	87/12659	6.24549e-06	8.35706e-05	4.97761e-05	K04368/K00693/K07190/K04739/K02833/K02183/K07192/K04345/K00688	9
ko04916	Melanogenesis	8/191	67/12659	7.06776e-06	8.71031e-05	5.18801e-05	K04368/K04632/K04534/K05858/K02833/K04630/K02183/K04345	8
ko00983	Drug metabolism - other enzymes	6/191	32/12659	7.12944e-06	8.71031e-05	5.18801e-05	K00757/K00760/K01464/K00088/K00106/K00699	6
ko04611	Platelet activation	9/191	90/12659	8.27176e-06	9.67217e-05	5.76091e-05	K12319/K04632/K07376/K05858/K04630/K06270/K12757/K04345/K05692	9
ko04961	Endocrine and other factor-regulated calcium reabsorption	6/191	33/12659	8.60513e-06	9.67217e-05	5.76091e-05	K04632/K11827/K04645/K05858/K04345/K08539	6
ko04924	Renin secretion	7/191	50/12659	9.20252e-06	9.9458e-05	5.92389e-05	K12319/K04632/K05858/K04630/K02183/K04345/K13755	7
ko04270	Vascular smooth muscle contraction	9/191	94/12659	1.18289e-05	0.000123109	7.33256e-05	K04368/K12319/K04632/K07376/K05858/K06270/K02183/K12337/K04345	9
ko04926	Relaxin signaling pathway	9/191	96/12659	1.40499e-05	0.000141001	8.39828e-05	K04368/K04632/K04500/K04534/K05858/K04539/K02833/K04630/K04345	9
ko00230	Purine metabolism	13/191	208/12659	1.59965e-05	0.000155001	9.2321e-05	K13811/K18283/K12319/K00759/K00760/K00944/K13298/K18437/K00873/K13755/K00088/K00106/K00939	13
ko04915	Estrogen signaling pathway	8/191	77/12659	2.00511e-05	0.000187812	0.000111864	K04368/K04632/K04534/K05858/K02833/K04630/K02183/K04345	8
ko05030	Cocaine addiction	6/191	39/12659	2.35121e-05	0.000213126	0.000126942	K04632/K05210/K11716/K00274/K04630/K04345	6
ko04371	Apelin signaling pathway	9/191	104/12659	2.68441e-05	0.000235725	0.000140402	K04368/K04500/K05858/K04539/K02833/K05869/K04630/K02183/K04345	9
ko04740	Olfactory transduction	5/191	25/12659	3.08448e-05	0.000262648	0.000156438	K18283/K07376/K02183/K04345/K13755	5
ko00410	beta-Alanine metabolism	6/191	44/12659	4.77844e-05	0.000394924	0.000235224	K00149/K00248/K01464/K00128/K07515/K13524	6
ko05031	Amphetamine addiction	6/191	46/12659	6.18396e-05	0.000487943	0.000290627	K04632/K05210/K00274/K05869/K02183/K04345	6
ko04725	Cholinergic synapse	8/191	90/12659	6.25122e-05	0.000487943	0.000290627	K04368/K04534/K05858/K04539/K02833/K05869/K04630/K04345	8
ko05230	Central carbon metabolism in cancer	6/191	48/12659	7.90155e-05	0.00060009	0.000357424	K04368/K01834/K00162/K02833/K00873/K00850	6
ko00250	Alanine, aspartate and glutamate metabolism	7/191	70/12659	8.56606e-05	0.000633437	0.000377286	K00820/K00814/K00827/K14455/K14454/K01953/K13524	7
ko04022	cGMP-PKG signaling pathway	9/191	121/12659	8.85978e-05	0.000638358	0.000380217	K04368/K18283/K12319/K07376/K05858/K04630/K06270/K02183/K12337	9
ko04066	HIF-1 signaling pathway	7/191	76/12659	0.000144775	0.00101705	0.00060577	K04368/K00162/K00850/K00927/K00134/K01623/K01689	7
ko00380	Tryptophan metabolism	7/191	78/12659	0.000170576	0.00112285	0.000668791	K00149/K00382/K03781/K00274/K00486/K00128/K07515	7
ko04070	Phosphatidylinositol signaling system	6/191	55/12659	0.000171035	0.00112285	0.000668791	K01092/K05858/K02183/K00901/K07756/K00888	6
ko04015	Rap1 signaling pathway	10/191	162/12659	0.000171825	0.00112285	0.000668791	K04368/K04632/K05210/K12362/K04534/K05858/K02833/K04630/K02183/K05692	10
ko00330	Arginine and proline metabolism	8/191	108/12659	0.000225426	0.00143639	0.000855536	K00797/K00149/K18123/K00274/K00128/K01259/K14455/K14454	8
ko00020	Citrate cycle (TCA cycle)	6/191	58/12659	0.000230026	0.00143639	0.000855536	K00030/K00382/K00162/K01681/K01676/K00234	6
ko04724	Glutamatergic synapse	7/191	88/12659	0.000361158	0.00216915	0.00129199	K04632/K05210/K04534/K05858/K04539/K04630/K04345	7
ko04970	Salivary secretion	6/191	63/12659	0.000362812	0.00216915	0.00129199	K12319/K04632/K07376/K05858/K02183/K04345	6
ko04912	GnRH signaling pathway	6/191	64/12659	0.000395389	0.00231467	0.00137866	K04368/K04632/K05858/K02833/K02183/K04345	6
ko04510	Focal adhesion	9/191	148/12659	0.000405581	0.00232589	0.00138534	K04368/K08131/K05700/K02833/K06270/K12757/K06278/K06238/K05692	9
ko04925	Aldosterone synthesis and secretion	6/191	65/12659	0.000430208	0.00241777	0.00144006	K18283/K04632/K05858/K05869/K02183/K04345	6
ko00982	Drug metabolism - cytochrome P450	4/191	25/12659	0.000495601	0.00273066	0.00162643	K04097/K00274/K00485/K00699	4
ko04211	Longevity regulating pathway	6/191	68/12659	0.000549184	0.0029677	0.00176762	K08733/K03781/K02833/K05869/K04345/K04564	6
ko04932	Non-alcoholic fatty liver disease (NAFLD)	8/191	124/12659	0.000574602	0.00304648	0.00181453	K03934/K03954/K03963/K03968/K03943/K03942/K03935/K00234	8
ko04146	Peroxisome	6/191	73/12659	0.00080265	0.00417675	0.00248775	K13337/K03781/K13237/K00106/K11187/K04564	6
ko04971	Gastric acid secretion	5/191	49/12659	0.000825923	0.00421971	0.00251333	K04632/K05858/K04630/K02183/K04345	5
ko00620	Pyruvate metabolism	7/191	104/12659	0.000987483	0.00495505	0.00295131	K00029/K00149/K00382/K00162/K00873/K00128/K01676	7
ko04962	Vasopressin-regulated water reabsorption	4/191	33/12659	0.00145921	0.00719366	0.00428467	K04632/K10428/K04345/K09865	4
ko00071	Fatty acid degradation	5/191	57/12659	0.00164568	0.00797302	0.00474887	K00149/K00248/K00128/K09478/K07515	5
ko00190	Oxidative phosphorylation	10/191	218/12659	0.00174467	0.00830937	0.0049492	K03934/K02129/K03954/K03963/K03968/K03943/K03942/K02132/K03935/K00234	10
ko04928	Parathyroid hormone synthesis, secretion and action	6/191	85/12659	0.0017769	0.00832181	0.00495661	K04368/K04632/K05858/K04630/K04345/K08539	6
ko04361	Axon regeneration	5/191	59/12659	0.00192056	0.00884715	0.00526951	K04632/K04534/K05858/K00901/K04345	5
ko04745	Phototransduction - fly	3/191	18/12659	0.00233463	0.0105811	0.00630231	K05858/K02183/K05692	3
ko04934	Cushing syndrome	7/191	122/12659	0.0024826	0.010985	0.00654284	K04368/K04632/K05858/K13298/K18437/K04630/K04345	7
ko04935	Growth hormone synthesis, secretion and action	6/191	91/12659	0.00251431	0.010985	0.00654284	K04368/K04632/K05858/K02833/K04630/K04345	6
ko05163	Human cytomegalovirus infection	9/191	192/12659	0.00254101	0.010985	0.00654284	K04368/K04632/K04534/K05858/K04539/K02833/K04630/K02183/K04345	9
ko04261	Adrenergic signaling in cardiomyocytes	6/191	95/12659	0.00312015	0.0132843	0.00791235	K04632/K04859/K05858/K04630/K02183/K04345	6
ko04024	cAMP signaling pathway	8/191	163/12659	0.003298	0.0138319	0.00823852	K04368/K04632/K05210/K05869/K04630/K06270/K02183/K04345	8
ko05205	Proteoglycans in cancer	8/191	165/12659	0.00355251	0.0146802	0.0087438	K04368/K10380/K04500/K02833/K06270/K06278/K04345/K05692	8
ko04144	Endocytosis	8/191	166/12659	0.00368535	0.0150085	0.0089393	K11827/K04500/K04645/K02833/K17919/K06278/K05633/K12492	8
ko04727	GABAergic synapse	5/191	69/12659	0.00382018	0.0153353	0.00913395	K04534/K04539/K04630/K04345/K13524	5
ko00630	Glyoxylate and dicarboxylate metabolism	6/191	100/12659	0.00402336	0.0159234	0.00948426	K01816/K18123/K00382/K03781/K01966/K01681	6
ko04923	Regulation of lipolysis in adipocytes	4/191	46/12659	0.00499812	0.0195065	0.0116184	K04632/K07376/K04630/K04345	4
ko05100	Bacterial invasion of epithelial cells	5/191	74/12659	0.00515518	0.0198439	0.0118194	K05700/K04645/K06278/K16942/K05692	5
ko04014	Ras signaling pathway	8/191	180/12659	0.00597935	0.0227054	0.0135237	K04368/K05210/K12362/K04539/K02833/K02183/K04345/K17637	8
ko00640	Propanoate metabolism	6/191	109/12659	0.00611731	0.0229195	0.0136513	K00382/K00166/K01966/K00248/K07515/K13524	6
ko04071	Sphingolipid signaling pathway	5/191	80/12659	0.00715729	0.0264631	0.0157619	K04368/K12351/K05858/K02833/K04630	5
ko00480	Glutathione metabolism	4/191	52/12659	0.00773236	0.0282181	0.0168072	K00797/K04097/K05361/K00682	4
ko01210	2-Oxocarboxylic acid metabolism	5/191	82/12659	0.00793055	0.0282776	0.0168426	K00030/K00814/K14455/K14454/K01681	5
ko04020	Calcium signaling pathway	7/191	151/12659	0.00794992	0.0282776	0.0168426	K04632/K07190/K05858/K05869/K02183/K04345/K13755	7
ko00030	Pentose phosphate pathway	5/191	83/12659	0.00833815	0.0292877	0.0174443	K01619/K00850/K01783/K01623/K01810	5
ko04927	Cortisol synthesis and secretion	4/191	54/12659	0.00882515	0.0302423	0.0180128	K04632/K05858/K18437/K04345	4
ko05214	Glioma	4/191	54/12659	0.00882515	0.0302423	0.0180128	K04368/K02833/K05869/K02183	4
ko05142	Chagas disease (American trypanosomiasis)	5/191	85/12659	0.0091965	0.0311351	0.0185446	K04632/K04500/K04534/K05858/K04630	5
ko05020	Prion diseases	3/191	30/12659	0.0101747	0.0340367	0.0202728	K04368/K06491/K04345	3
ko00310	Lysine degradation	5/191	88/12659	0.0105954	0.0347845	0.0207182	K00149/K00382/K18826/K00128/K07515	5
ko05221	Acute myeloid leukemia	4/191	57/12659	0.0106458	0.0347845	0.0207182	K04368/K10053/K02833/K02633	4
ko04213	Longevity regulating pathway - multiple species	4/191	58/12659	0.0113026	0.036506	0.0217436	K03781/K02833/K04345/K04564	4
ko04919	Thyroid hormone signaling pathway	5/191	90/12659	0.011605	0.0370083	0.0220428	K04368/K05858/K02833/K04345/K05692	5
ko05170	Human immunodeficiency virus 1 infection	7/191	163/12659	0.0118157	0.0370083	0.0220428	K04368/K04534/K04539/K02833/K04630/K02183/K10611	7
ko00220	Arginine biosynthesis	4/191	59/12659	0.0119849	0.0370083	0.0220428	K00814/K00611/K14455/K14454	4
ko04974	Protein digestion and absorption	4/191	59/12659	0.0119849	0.0370083	0.0220428	K08131/K13868/K01278/K06238	4
ko00980	Metabolism of xenobiotics by cytochrome P450	3/191	34/12659	0.0143523	0.0438371	0.0261101	K04097/K00079/K00699	3

## Sheet: P1
ID	Description	GeneRatio	BgRatio	pvalue	p.adjust	qvalue	geneID	Count
ko04142	Lysosome	4/28	103/12659	7.28291e-05	0.00267814	0.00216539	K01202/K06546/K06528/K12390	4
ko05204	Chemical carcinogenesis	3/28	38/12659	7.76273e-05	0.00267814	0.00216539	K07424/K00079/K00799	3
ko01524	Platinum drug resistance	3/28	46/12659	0.00013804	0.00317493	0.00256706	K16060/K14686/K00799	3
ko00970	Aminoacyl-tRNA biosynthesis	3/28	65/12659	0.000386195	0.00666186	0.0053864	K01887/K01868/K22503	3
ko00980	Metabolism of xenobiotics by cytochrome P450	2/28	34/12659	0.00253343	0.0349613	0.0282677	K00079/K00799	2
ko04215	Apoptosis - multiple species	2/28	39/12659	0.00332353	0.0382206	0.030903	K16060/K16061	2

## Sheet: P2
ID	Description	GeneRatio	BgRatio	pvalue	p.adjust	qvalue	geneID	Count
ko04978	Mineral absorption	4/58	35/12659	1.86844e-05	0.00252239	0.00218312	K14738/K00522/K01540/K14688	4
ko04142	Lysosome	5/58	103/12659	0.000105257	0.00710486	0.00614923	K05642/K01365/K12383/K12382/K12301	5

## Sheet: P3
ID	Description	GeneRatio	BgRatio	pvalue	p.adjust	qvalue	geneID	Count
ko04361	Axon regeneration	5/75	59/12659	2.48835e-05	0.00452879	0.00371942	K06704/K04459/K04441/K02599/K04851	5
ko03008	Ribosome biogenesis in eukaryotes	5/75	82/12659	0.000122004	0.00991924	0.00814651	K14572/K14525/K14536/K14550/K14285	5
ko03013	RNA transport	6/75	138/12659	0.000163504	0.00991924	0.00814651	K12172/K14301/K00784/K13171/K14525/K14285	6
ko05145	Toxoplasmosis	5/75	95/12659	0.000244059	0.0111047	0.00912009	K16061/K04734/K05635/K04441/K16060	5
ko05222	Small cell lung cancer	4/75	74/12659	0.000955737	0.0346047	0.0284203	K16061/K04734/K05635/K16060	4
ko04978	Mineral absorption	3/75	35/12659	0.00114081	0.0346047	0.0284203	K14683/K00522/K21398	3

[truncated: 4 more sheets: P4, P5, P_UP, P_DOWN]
